# Supplementary material
Source: PubMed Central journal article supplement (PMC9448012)
Supplement: JCOPDF-9-413-s001.pdf [file JCOPDF-9-413-s001.pdf]

## Online Supplement

**Table S1.** Association between sputum eosinophils and computed tomography morphology.

| Variable (Mean ± SE)           | Sputum<br>EOS < 3.0% | Sputum<br>EOS ≥ 3.0% | <i>P</i> value <sup>b</sup> |
|--------------------------------|----------------------|----------------------|-----------------------------|
| Radiographic measurements      |                      |                      |                             |
| Ln (LAA <sub>-950</sub> ), %   | -0.01±0.18           | 0.33±0.19            | 0.008 <sup>a</sup>          |
| Exp (LAA <sub>-950a</sub> ), % | 0.99                 | 1.39                 |                             |
| Ln (LAA <sub>-856</sub> ), %   | 2.99±0.11            | 3.15±0.11            | 0.037 <sup>a</sup>          |
| Exp (LAA <sub>-856</sub> ), %  | 19.89                | 23.34                |                             |

Data are mean ± standard error (Mean ± SE);

Abbreviations: **COPD**, chronic obstructive pulmonary disease; Ln = natural log; Exp = exponentiation of natural log; **LAA<sub>-950</sub>**, low-attenuation area of the lung with attenuation values below -950 Hounsfield units; **LAA<sub>-856</sub>**, low-attenuation area of the lung with attenuation values below -856 Hounsfield units.

<sup>b</sup>: Outcomes were adjusted for age, sex, body mass index group, smoking status, pack-years of smoking, family history of respiratory diseases, biofuel exposure, occupational exposure, passive smoke and corticosteroid therapy.

<sup>a</sup>:  $P < 0.05$ .

**Table S2.** Factors associated with sputum eosinophil Count in spirometry-defined COPD patients according to multivariate logistic regression analysis

|                                        | Subject (n) | High sputum eosinophils (n, %) | Crude            |                              | Adjusted         |                              |
|----------------------------------------|-------------|--------------------------------|------------------|------------------------------|------------------|------------------------------|
|                                        |             |                                | OR (95% CI)      | P value                      | OR (95% CI)      | P value <sup>b</sup>         |
| Sex, n (%)                             |             |                                |                  |                              |                  |                              |
| Female                                 | 45          | 14 (31.1)                      | 1.00 (Reference) |                              | 1.00 (Reference) |                              |
| Male                                   | 803         | 299 (37.2)                     | 1.31 (0.69-2.50) | 0.407                        | 0.98 (0.40-2.39) | 0.959                        |
| Age(years)                             |             |                                |                  |                              |                  |                              |
| <60                                    | 179         | 59 (33.0)                      | 1.00 (Reference) |                              | 1.00 (Reference) |                              |
| ≥60                                    | 669         | 254 (38.0)                     | 1.25 (0.88-1.76) | 0.218                        | 1.26 (0.86-1.85) | 0.237                        |
| Body mass index, kg/m <sup>2</sup>     |             |                                |                  | 0.844                        |                  | 0.320                        |
| <18.5                                  | 90          | 31 (34.4)                      | 1.00 (Reference) |                              | 1.00 (Reference) |                              |
| 18.5-24.9                              | 597         | 224 (37.5)                     | 1.14 (0.72-1.82) | 0.574                        | 1.34 (0.81-2.21) | 0.252                        |
| ≥25.0                                  | 159         | 58 (36.5)                      | 1.09 (0.64-1.88) | 0.748                        | 1.57 (0.87-2.83) | 0.131                        |
| Smoking status                         |             |                                |                  | <b>0.001<sup>a</sup></b>     |                  | <b>0.002<sup>a</sup></b>     |
| Never smoked                           | 94          | 28 (29.8)                      | 1.00 (Reference) |                              | 1.00 (Reference) |                              |
| Former smoking                         | 223         | 106 (47.5)                     | 2.14 (1.28-3.57) | <b>0.004<sup>a</sup></b>     | 1.98 (1.01-3.82) | <b>0.048<sup>a</sup></b>     |
| Current smoking                        | 531         | 179 (33.7)                     | 1.20 (0.74-1.93) | 0.457                        | 1.08 (0.56-2.08) | 0.814                        |
| Family history of respiratory diseases |             |                                |                  |                              |                  |                              |
| No                                     | 714         | 250 (35.0)                     | 1.00 (Reference) |                              | 1.00 (Reference) |                              |
| Yes                                    | 134         | 63 (47.0)                      | 1.65 (1.14-2.39) | <b>0.008<sup>a</sup></b>     | 1.72 (1.15-2.57) | <b>0.009<sup>a</sup></b>     |
| Biofuel exposure                       |             |                                |                  |                              |                  |                              |
| No                                     | 549         | 195 (35.5)                     | 1.00 (Reference) |                              | 1.00 (Reference) |                              |
| Yes                                    | 299         | 118 (39.5)                     | 1.18 (0.89-1.58) | 0.255                        | 1.31 (0.96-1.80) | 0.094                        |
| Occupational exposure                  |             |                                |                  |                              |                  |                              |
| No                                     | 579         | 205 (35.4)                     | 1.00 (Reference) |                              | 1.00 (Reference) |                              |
| Yes                                    | 269         | 108 (40.1)                     | 1.22 (0.91-1.65) | 0.183                        | 1.05 (0.76-1.46) | 0.750                        |
| Passive smoke                          |             |                                |                  |                              |                  |                              |
| No                                     | 558         | 195 (34.9)                     | 1.00 (Reference) |                              | 1.00 (Reference) |                              |
| Yes                                    | 290         | 118 (40.7)                     | 1.28 (0.95-1.71) | 0.100                        | 1.35 (0.98-1.85) | 0.064                        |
| Symptoms                               |             |                                |                  |                              |                  |                              |
| Low                                    | 679         | 235 (34.6)                     | 1.00 (Reference) |                              | 1.00 (Reference) |                              |
| High                                   | 158         | 73 (46.2)                      | 1.62 (1.14-2.30) | <b>0.006<sup>a</sup></b>     | 1.55 (1.06-2.26) | <b>0.024<sup>a</sup></b>     |
| Blood eosinophils                      |             |                                |                  |                              |                  |                              |
| <300cells/ μ L                         | 647         | 195 (30.1)                     | 1.00 (Reference) |                              | 1.00 (Reference) |                              |
| ≥300 cells/ μ L                        | 201         | 118 (58.7)                     | 3.30 (2.38-4.57) | <b>&lt;0.001<sup>a</sup></b> | 3.51 (2.49-4.96) | <b>&lt;0.001<sup>a</sup></b> |

Abbreviations: **COPD**, chronic obstructive pulmonary disease; **OR**, odds ratio; **CI**, confidence interval.

<sup>b</sup>: Outcomes were adjusted for age, sex, body mass index group, smoking status, pack-years of smoking, family history of respiratory diseases, biofuel exposure, occupational exposure, passive smoke and corticosteroid therapy.

<sup>a</sup>:  $P < 0.05$ .

**Table S3.** Clinical characteristics of two groups (induced success and induced failure).

| Characteristics                        | Failure (n=215) | Success (n=895) | P value             |
|----------------------------------------|-----------------|-----------------|---------------------|
| Males, n (%)                           | 166 (77.2)      | 845 (94.4)      | <0.001 <sup>a</sup> |
| Age, years                             | 65.7±8.3        | 65.1±7.2        | 0.249               |
| Body mass index, kg/m <sup>2</sup>     | 21.9±3.4        | 22.2±3.3        | 0.185               |
| Smoking status, n (%)                  |                 |                 | <0.001 <sup>a</sup> |
| Never smoked                           | 61 (28.4)       | 102 (11.4)      |                     |
| Former smoking                         | 61 (28.4)       | 244 (27.3)      |                     |
| Current smoking                        | 93 (43.3)       | 549 (61.3)      |                     |
| Smoking index, pack × years            | 35.5±32.7       | 44.8±33.2       | <0.001 <sup>a</sup> |
| History of respiratory diseases, n (%) | 30 (14.0)       | 156 (17.4)      | 0.140               |
| Passive smoke, n (%)                   | 65 (30.2)       | 308 (34.4)      | 0.244               |
| Biomass use, n (%)                     | 72 (33.5)       | 322 (36.0)      | 0.493               |
| Occupational exposure, n (%)           | 63 (29.3)       | 291 (32.5)      | 0.364               |
| Comorbidity, n (%)                     |                 |                 |                     |
| Hypertension                           | 40 (18.6)       | 168 (18.8)      | 0.955               |
| Diabetes                               | 7 (3.3)         | 25 (2.8)        | 0.716               |
| Coronary heart disease                 | 4 (1.9)         | 31 (3.5)        | 0.227               |
| mMRC dyspnea scale score               | 0.52±0.78       | 0.54±0.75       | 0.700               |
| CAT score                              | 5.56±5.76       | 5.60±5.83       | 0.925               |
| CCQ score                              | 6.18±7.16       | 7.25±7.45       | 0.060               |
| Blood eosinophil, cells/μ L            | 162 (93-299)    | 180 (110-290)   | 0.136               |
| Inhaled corticosteroid therapy, n (%)  | 10 (4.6)        | 47 (5.3)        | 0.725               |

Data are mean ± standard deviation or n (%), or median (interquartile range).

Abbreviations: **mMRC**, modified British medical research council score; **CAT**, COPD assessment test; **CCQ**, clinical COPD questionnaire;

<sup>a</sup>:  $P < 0.05$ .
